# Supplementary material for: Mapping the landscape of metabolic goals of a cell
Source: Genome Biol. 2016 May 23;17:109. doi: 10.1186/s13059-016-0968-2 (PMC4878026; doi:10.1186/s13059-016-0968-2)
Supplement: Additional file 6: Table S8. — shows invFBA results from L1 and L0 regularization of simulated E. coli data under different growth conditions (with maximization of ATP synthase as the objective). (XLSX 8 kb) [file 13059_2016_968_MOESM6_ESM.xlsx]

## Sheet: Table S8
Supplementary Table 8: InvFBA results from L1 and L0 regularization of simulated E. coli data under different growth conditions (Maximazation of ATP synthase)
Growth condition		L1 norm regularization	L0 norm regularization
glucose minimal medium	# of non-zero elements in c	3	1
	Reaction of maximal coefficient	ATP synthase	ATP synthase
	The maximal value	0.8333	1
succinate minimal medium	# of non-zero elements in c	1	1
	Reaction of maximal coefficient	ATP synthase	ATP synthase
	The maximal value	1	1
glycerol minimal medium	# of non-zero elements in c	2	1
	Reaction of maximal coefficient	ATP synthase	ATP synthase
	The maximal value	0.8333	1
